# Supplementary material
Source: PubMed Central journal article supplement (PMC8358802)
Supplement: jamadermatol-e212856-s001.pdf [file jamadermatol-e212856-s001.pdf]

## Supplemental Online Content

Anand N, Edwards L, Baker LX, Chren MM, Wheless L. Validity of using billing codes from electronic health records to estimate skin cancer counts. *JAMA Dermatol*. Published online August 11, 2021. doi:10.1001/jamadermatol.2021.2856

**eTable 1.** Clinical Billing Codes Used to Identify Individuals With Any Skin Cancer

**eTable 2.** *Current Procedural Terminology* Codes Used to Identify Potential Individual's Tumors

**eTable 3.** Number of Patients and Tumors by Skin Cancer Type

This supplemental material has been provided by the authors to give readers additional information about their work.

eTable 1. Clinical Billing Codes Used to Identify Individuals With Any Skin Cancer

| <b>Disease</b>                                                                                      | <b>ICD-9</b>                                             | <b>ICD-10</b>      |
|-----------------------------------------------------------------------------------------------------|----------------------------------------------------------|--------------------|
| Basal Cell Carcinoma                                                                                | 173.*1                                                   | C44.*1*            |
| Squamous Cell Carcinoma                                                                             | 173.*2                                                   | C44.*2*            |
| Other <sup>a</sup> and unspecified skin cancer                                                      | 173.*0<br>173.*9<br>232.*                                | C44.*0*<br>C44.*9* |
| Melanoma                                                                                            | 172.*                                                    | C43.*<br>D03.*     |
| Merkel Cell Carcinoma                                                                               | 209.31<br>209.32<br>209.33<br>209.34<br>209.35<br>209.36 | C4A.*              |
| a – includes tumors of the sebaceous glands, sweat glands, and adnexal structures<br>* - all values |                                                          |                    |

eTable 2. *Current Procedural Terminology* Codes Used to Identify Potential Individual's

Tumors

|       | Malignant Destruction                                    | Malignant Excision                                       | Mohs    |
|-------|----------------------------------------------------------|----------------------------------------------------------|---------|
| Codes | 11600-4<br>11606<br>16200-4<br>11626<br>11640-4<br>11646 | 17260-4<br>17266<br>17270-4<br>17276<br>17280-4<br>17286 | 17311-5 |

eTable 3. Number of Patients and Tumors by Skin Cancer Type

|                                                                         | BCC    | SCC   | Melanoma | Merkel | Other |
|-------------------------------------------------------------------------|--------|-------|----------|--------|-------|
| Number of lesions having <i>ICD</i> and <i>CPT</i> code on the same day | 13,087 | 7,456 | 2,829    | 56     | 6,009 |
| Number of unique patients                                               | 6,736  | 3,487 | 1,435    | 32     | 2,412 |
